# Supplementary material for: Metal-free Janus α- and β-SiCP4: designing stable and efficient two-dimensional semiconductors for water splitting
Source: Royal Society of Chemistry journal article supplement (doi:10.1039/d3cp03300g), 2023-01-01
Supplement: d3cp03300g1.pdf [file d3cp03300g1.pdf]

## Support Information

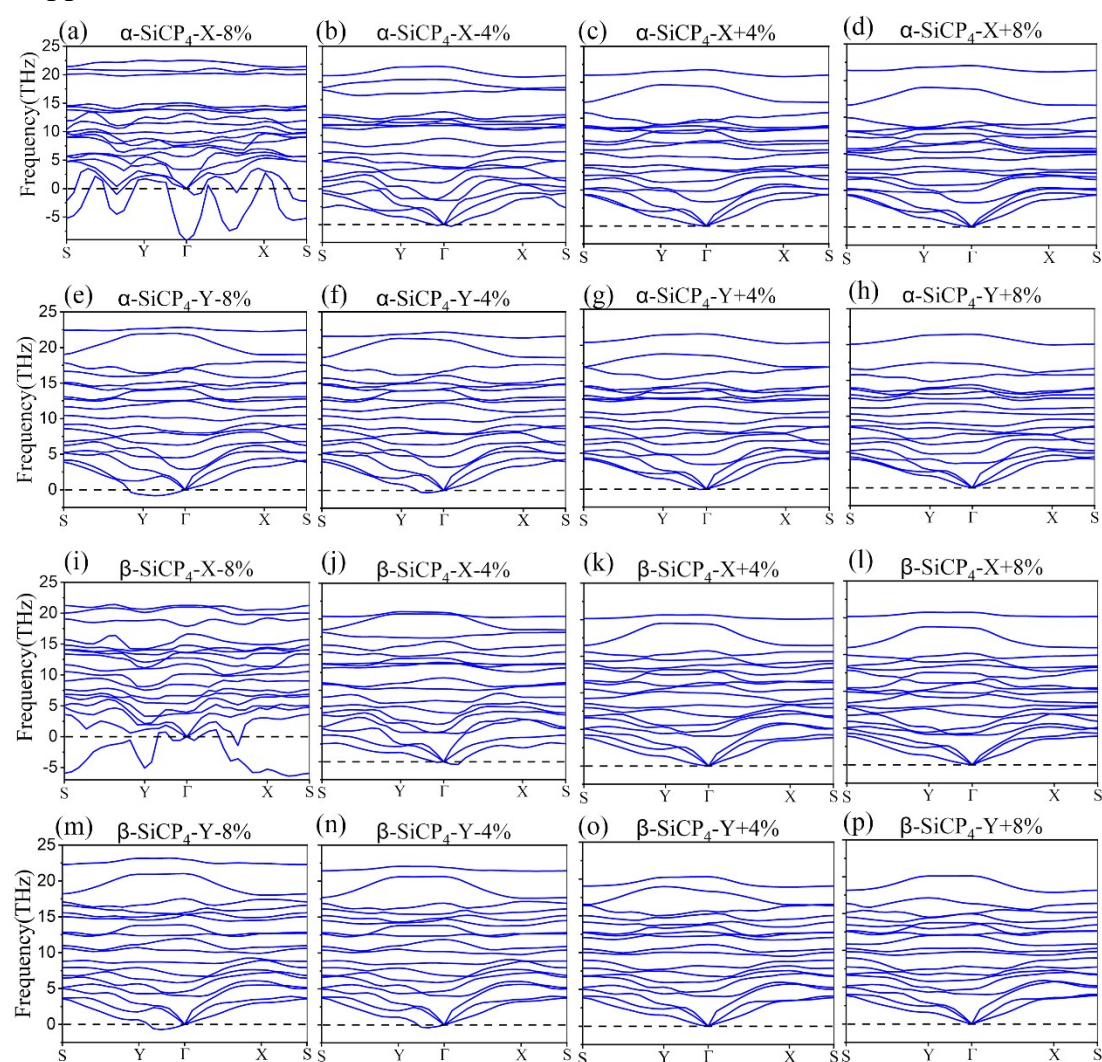

**Fig.S1** (a) - (d) the phonon spectrum of monolayer  $\alpha$ -SiCP<sub>4</sub> with X-direction strain for -8%, -4%, 4% and 8%. (e) - (h) the phonon spectrum of monolayer  $\alpha$ -SiCP<sub>4</sub> with Y-direction strain for -8%, -4%, 4% and 8%. (i) - (l) the phonon spectrum of monolayer  $\beta$ -SiCP<sub>4</sub> with X-direction strain for -8%, -4%, 4% and 8%. (m) - (p) the phonon spectrum of monolayer  $\beta$ -SiCP<sub>4</sub> with Y-direction strain for -8%, -4%, 4% and 8%.

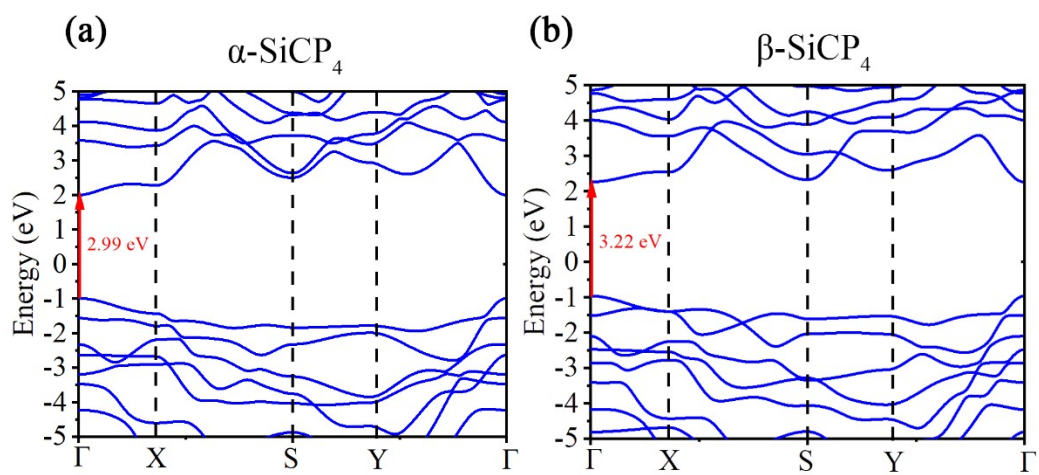

**Fig.S2** (a) - (b) the quasi particle band structure of monolayer  $\alpha$ - and  $\beta$ -SiCP<sub>4</sub>.
